# Supplementary material for: Antidepressant-Like Properties of Intrastriatal Botulinum Neurotoxin-A Injection in a Unilateral 6-OHDA Rat Model of Parkinson’s Disease
Source: MDPI journal article supplement (doi:10.3390/toxins13070505), 2021-07-20
Supplement: s1 [file s1]

# Supplementary Materials: Antidepressant-Like Properties of Intrastriatal Botulinum Neurotoxin-A Injection in a Unilateral 6-OHDA Rat Model of Parkinson's Disease

Veronica Antipova, Carsten Holzmann, Alexander Hawlitschka, Martin Witt and Andreas Wree

**Table S1.** Overview of the preclinical studies investigating the depressive- and anxiety-like behavior after unilateral lesion into the MFB in rats.

| Study                    | Rat Strain<br>Male | Unilateral<br>Injection into<br>Medial<br>Forebrain<br>Bundle (MFB) | Depression/Test/Parameter/<br>Results                                                                                                                                                              | Anxiety/Test/Parameter/Results                                                                                                                                                                                                                                                                                                                                                                                                                                                                                                                |
|--------------------------|--------------------|---------------------------------------------------------------------|----------------------------------------------------------------------------------------------------------------------------------------------------------------------------------------------------|-----------------------------------------------------------------------------------------------------------------------------------------------------------------------------------------------------------------------------------------------------------------------------------------------------------------------------------------------------------------------------------------------------------------------------------------------------------------------------------------------------------------------------------------------|
| Carvalho et al. 2013 [1] | Wistar-Han         | Right MFB                                                           | <b>Sucrose preference test:</b> the preference for a sweet solution was shown to be significantly affected by unilateral 6-OHDA lesion of the MFB in 6-OHDA groups compare to Sham-lesioned group. | <p><b>OFT:</b> Total distance traveled and number of ambulatory episodes.</p> <p>6-OHDA-lesioned group displaying a significantly lower motor activity when compare to Sham-operated rats (decreased total distance travelled) and overall reduction in movement initiation (decreased ambulatory episodes) caused by 6-OHDA lesion.</p> <p><b>EPM:</b> The ration between time in open arms and in closed arms was measured.</p> <p>No significant differences were found between the 6-OHDA and Sham groups regarding the ratio between</p> |

|                                 |                |           |                                                                                                                                                                                             | time spent on the open arm and time spent on closed arms.                                                                                                                                                                                                        |
|---------------------------------|----------------|-----------|---------------------------------------------------------------------------------------------------------------------------------------------------------------------------------------------|------------------------------------------------------------------------------------------------------------------------------------------------------------------------------------------------------------------------------------------------------------------|
|                                 |                |           |                                                                                                                                                                                             | <b>OFT:</b> Locomotor activity.                                                                                                                                                                                                                                  |
| Delaville et al. 2012 [2]       | Wistar         | Right MFB | <b>FST:</b> Immobility: 6-OHDA depletion alone did not produce any changes in “depressive-like” behavior compare to Sham-lesioned animals.                                                  | 6-OHDA-lesioned group displaying a significantly lower locomotor activity than Sham animals.                                                                                                                                                                     |
|                                 |                |           | <b>Sucrose preference test:</b> 6-OHDA-lesioned rats did not show any changes in sucrose consumption compared to Sham-lesioned animals.                                                     | <b>EPM:</b> Time spent in the open and closed arms and number of entries into the open and closed arms.<br><br>No significant differences were found between the 6-OHDA and Sham groups regarding the number of entries, as well as the time spent in open arms. |
| Eskow Jaunarajs et al. 2010 [3] | Sprague-Dawley | Left MFB  | <b>FST:</b> Immobility; Climbing; Swimming.                                                                                                                                                 | <b>Locomotor chambers</b> (motor and anxiety-like behaviors): significantly reduced total distance traveled in hemi-PD group compare to Sham group by approx. 50%.                                                                                               |
|                                 |                |           | Immobility: no significant increase of immobility (no significant changes).<br><br>Climbing: a significant effect on climbing behavior (decrease).<br><br>Swimming: no significant changes. | <b>Social interaction test:</b> reduction in frequency to approach the stimulus animal in DA-lesioned rats compare to Sham-lesioned group; significant decrease of anogenital sniffing, but not other sniffing, or flights.                                      |

|                     |                |           |                                                                                                                                                                                                                                                                                                          |                                                                                                                                                                                                                                                                                                         |
|---------------------|----------------|-----------|----------------------------------------------------------------------------------------------------------------------------------------------------------------------------------------------------------------------------------------------------------------------------------------------------------|---------------------------------------------------------------------------------------------------------------------------------------------------------------------------------------------------------------------------------------------------------------------------------------------------------|
|                     |                |           | Unilateral DA lesion not alter depression-like behavior in DA-lesioned rats measured by the FST.                                                                                                                                                                                                         | Unilateral DA lesion exerted anxiogenic effects on locomotor activity and social interaction.                                                                                                                                                                                                           |
| Hui et al. 2014 [4] | Sprague-Dawley | Right MFB | <p><b>FST:</b> Immobility time: there was a strong tendency for 6-OHDA-lesioned rats to be more immobile than Sham-operated rats.</p> <p><b>Sucrose preference test:</b> rats showed the decreased sucrose consumption compared to Sham-operated rats.</p>                                               | <p><b>OFT:</b> Number of squares crossed (horizontal locomotion); number of rearings (vertical activity).</p> <p>Unilateral 6-OHDA lesion decreased the number of squares crossed (horizontal movement) and rearing (vertical movement) - striking impairments in horizontal and vertical activity.</p> |
| Liu et al. 2015 [5] | Wistar         | Left MFB  | <p><b>FST:</b> Immobility time: there was a strong tendency for 6-OHDA-lesioned rats to be more immobile than Sham-operated rats.</p> <p><b>Sucrose preference test:</b> unilateral 6-OHDA lesion of the MFB in rats significantly decreased sucrose consumption when compare to Sham-operated rats.</p> | <p><b>OFT:</b> Number of squares crossed (horizontal locomotion); number of rearings (vertical activity).</p> <p>Unilateral 6-OHDA lesion decreased the number of squares crossed (horizontal movement) and rearing (vertical movement).</p>                                                            |

|                          |                |           |          |                                                                                                                                                                                                                                                                                                                                                                                                                                                         |
|--------------------------|----------------|-----------|----------|---------------------------------------------------------------------------------------------------------------------------------------------------------------------------------------------------------------------------------------------------------------------------------------------------------------------------------------------------------------------------------------------------------------------------------------------------------|
|                          |                |           |          | <p><b>OFT:</b> The total distance traveled; time spent in center; the number of entries into the center and latency to enter the center.</p> <p>6-OHDA-lesioned group displaying a significantly lower locomotor activity (distance traveled) than Sham animals, but no significant differences were found between the 6-OHDA-lesioned animals and Sham-lesioned animals in time in center; center crossing; latency to enter the center.</p>           |
| O'Connor et al. 2016 [6] | Sprague-Dawley | Right MFB | Not done | <p><b>EPM:</b> Time spent in the open arm and number of open and closed arm entries.</p> <p>6-OHDA animals significantly spent less time in the open arm (open arms entries) than Sham rats or naïve rats. Also, 6-OHDA animals significantly spent less time in the closed arm (closed arms entries) than Sham rats but not naïve rats – implying that 6-OHDA animals have high baseline anxiety-like behavior and 6-OHDA lesioning is anxiogenic.</p> |
| Sun et al. 2015 [7]      | Sprague-Dawley | Right MFB | Not done | <p><b>OFT:</b> Number of squares crossed (horizontal locomotion); number of</p>                                                                                                                                                                                                                                                                                                                                                                         |

|                       |                |           |                                                                                                                                                                                  |                                                                                                                                                                                                                 |
|-----------------------|----------------|-----------|----------------------------------------------------------------------------------------------------------------------------------------------------------------------------------|-----------------------------------------------------------------------------------------------------------------------------------------------------------------------------------------------------------------|
|                       |                |           |                                                                                                                                                                                  | rearing (vertical activity); the percent of time spent in the central area.                                                                                                                                     |
|                       |                |           |                                                                                                                                                                                  | Unilateral 6-OHDA lesion decreased the number of squares crossed (horizontal movement) and rearing (vertical movement), and decreased the percent of time spent in central area in the OFT.                     |
|                       |                |           |                                                                                                                                                                                  | <b>EPM:</b> The percent of time spent in open arms and the percent of entries in open arms.                                                                                                                     |
|                       |                |           |                                                                                                                                                                                  | Unilateral 6-OHDA lesion decreased the percent of open arm time and open arm entries.                                                                                                                           |
| Zhang et al. 2011 [8] | Sprague-Dawley | Right MFB | <b>FST:</b> Time immobile: a strong trend for unilaterally 6-OHDA-lesioned rats to be immobile compared to control group.                                                        | <b>OFT:</b> Horizontal activity: no significant differences between 6-OHDA and control group.<br><br>Rearing: no significant differences between 6-OHDA and control group.                                      |
| Zhang et al. 2015 [9] | Sprague-Dawley | Right MFB | <b>FST:</b> Immobility time: unilateral lesioning MFB increased immobility time when compare to Sham-operated rats.<br><b>Sucrose preference test:</b> rats showed the decreased | <b>OFT:</b> Number of squares crossed (horizontal locomotion); number of rearings (vertical activity).<br>Unilateral lesion decreased the number of squares crossed (horizontal movement) and rearing (vertical |

---

|                                                           |                                                                          |
|-----------------------------------------------------------|--------------------------------------------------------------------------|
| sucrose consumption<br>compared to Sham-operated<br>rats. | movement) - striking impairments in<br>horizontal and vertical activity. |
|-----------------------------------------------------------|--------------------------------------------------------------------------|

---

Table S2. Spearman correlation table.

| Treatment Group | FST Parameter        | Anxiety-Related Parameter | rs       | p     | Number of Samples |
|-----------------|----------------------|---------------------------|----------|-------|-------------------|
| 6-OHDA + BoNT   | struggling frequency | EPM %time on open arms    | −0.116   | 0.638 | 18                |
| 6-OHDA + Sham   | struggling frequency | EPM %time on open arms    | 0.201    | 0.559 | 10                |
| Sham + Sham     | struggling frequency | EPM %time on open arms    | −0.237   | 0.49  | 10                |
| 6-OHDA + BoNT   | struggling time      | EPM %time on open arms    | −0.174   | 0.482 | 18                |
| 6-OHDA + Sham   | struggling time      | EPM %time on open arms    | −0.0788  | 0.811 | 10                |
| Sham + Sham     | struggling time      | EPM %time on open arms    | −0.127   | 0.707 | 10                |
| 6-OHDA + BoNT   | immobility frequency | EPM %time on open arms    | −0.0836  | 0.736 | 18                |
| 6-OHDA + Sham   | immobility frequency | EPM %time on open arms    | 0.360    | 0.292 | 10                |
| Sham + Sham     | immobility frequency | EPM %time on open arms    | −0.079   | 0.811 | 10                |
| 6-OHDA + BoNT   | immobility time      | EPM %time on open arms    | −0.0175  | 0.941 | 18                |
| 6-OHDA + Sham   | immobility time      | EPM %time on open arms    | 0.382    | 0.258 | 10                |
| Sham + Sham     | immobility time      | EPM %time on open arms    | 0.309    | 0.365 | 10                |
| 6-OHDA + BoNT   | struggling frequency | OFT center/total time     | 0.180    | 0.466 | 18                |
| 6-OHDA + Sham   | struggling frequency | OFT center/total time     | 0.0306   | 0.919 | 10                |
| Sham + Sham     | struggling frequency | OFT center/total time     | −0.00617 | 0.973 | 10                |
| 6-OHDA + BoNT   | struggling time      | OFT center/total time     | −0.108   | 0.662 | 18                |
| 6-OHDA + Sham   | struggling time      | OFT center/total time     | −0.419   | 0.213 | 10                |
| Sham + Sham     | struggling time      | OFT center/total time     | 0.0308   | 0.919 | 10                |
| 6-OHDA + BoNT   | immobility frequency | OFT center/total time     | 0.159    | 0.519 | 18                |
| 6-OHDA + Sham   | immobility frequency | OFT center/total time     | −0.107   | 0.759 | 10                |
| Sham + Sham     | immobility frequency | OFT center/total time     | 0.198    | 0.559 | 10                |
| 6-OHDA + BoNT   | immobility time      | OFT center/total time     | 0.138    | 0.574 | 18                |
| 6-OHDA + Sham   | immobility time      | OFT center/total time     | 0.620    | 0.048 | 10                |
| Sham + Sham     | immobility time      | OFT center/total time     | 0.135    | 0.681 | 10                |

Green colored *p* values indicate significant correlation.

## References

1. Carvalho, M. M.; Campos, F. L.; Coimbra, B.; Pêgo, J. M.; Rodrigues, C.; Lima, R.; Rodrigues, A. J.; Sousa, N.; Salgado, A. J. Behavioral characterization of the 6-hydroxydopamine model of Parkinson's disease and pharmacological rescuing of non-motor deficits. *Mol. Neurodegener.* **2013**, *8*, 14, doi:10.1186/1750-1326-8-14.
2. Delaville, C.; Chetrit, J.; Abdallah, K.; Morin, S.; Cardoit, L.; De Deurwaerdère, P.; Benazzouz, A. Emerging dysfunctions consequent to combined monoaminergic depletions in parkinsonism. *Neurobiol. Dis.* **2012**, *45*, 763–773, doi:10.1016/j.nbd.2011.10.023.
3. Eskow Jaunarajs, K. L.; Dupre, K. B.; Ostock, C. Y.; Button, T.; Deak, T.; Bishop, C. Behavioral and neurochemical effects of chronic L-DOPA treatment on nonmotor sequelae in the hemiparkinsonian rat. *Behav. Pharmacol.* **2010**, *21*, 627–637, doi:10.1097/FBP.0b013e32833e7e80.
4. Hui, Y. P.; Zhang, Q. J.; Zhang, L.; Chen, L.; Guo, Y.; Qiao, H. F.; Wang, Y.; Liu, J. Activation of prefrontal 5-HT<sub>1A</sub> receptors produces antidepressant-like effects in a unilateral rat model of Parkinson's disease. *Neuroscience* **2014**, *268*, 265–275, doi:10.1016/j.neuroscience.2014.03.033.
5. Liu, K. C.; Li, J. Y.; Tan, H. H.; Du, C. X.; Xie, W.; Zhang, Y. M.; Ma, W. L.; Zhang, L. Serotonin<sub>6</sub> receptors in the dorsal hippocampus regulate depressive-like behaviors in unilateral 6-hydroxydopamine-lesioned Parkinson's rats. *Neuropharmacology* **2015**, *95*, 290–298, doi:10.1016/j.neuropharm.2015.03.031.
6. O'Connor, K. A.; Feustel, P. J.; Ramirez-Zamora, A.; Molho, E.; Pilitsis, J. G.; Shin, D. S. Investigation of diazepam efficacy on anxiety-like behavior in hemiparkinsonian rats. *Behav. Brain Res.* **2016**, *301*, 226–237, doi:10.1016/j.bbr.2015.12.045.
7. Sun, Y. N.; Wang, T.; Wang, Y.; Han, L. N.; Li, L. B.; Zhang, Y. M.; Liu, J. Activation of 5-HT<sub>1A</sub> receptors in the medial subdivision of the central nucleus of the amygdala produces anxiolytic effects in a rat model of Parkinson's disease. *Neuropharmacology* **2015**, *95*, 181–191, doi:10.1016/j.neuropharm.2015.03.007.
8. Zhang, X.; Egeland, M.; Svenningsson, P. Antidepressant-like properties of sarizotan in experimental Parkinsonism. *Psychopharmacology (Berl.)* **2011**, *218*, 621–634, doi:10.1007/s00213-011-2356-7.
9. Zhang, Q. J.; Du, C. X.; Tan, H. H.; Zhang, L.; Li, L. B.; Zhang, J.; Niu, X. L.; Liu, J. Activation and blockade of serotonin<sub>7</sub> receptors in the prefrontal cortex regulate depressive-like behaviors in a 6-hydroxydopamine-induced Parkinson's disease rat model. *Neuroscience* **2015**, *311*, 45–55, doi:10.1016/j.neuroscience.2015.10.016.
